# Supplementary material for: Development of 3D-printed foods incorporating riboflavin-loaded whey protein isolate nanostructures: characterization and in vitro digestion
Source: Royal Society of Chemistry journal article supplement (doi:10.1039/d4fo05102e), 2025-01-01
Supplement: d4fo05102e2.pdf [file d4fo05102e2.pdf]

| <b>Abs (570 nm)</b> | <b>15</b> | <b>25</b> | <b>35</b> | <b>50</b> | <b>75</b> | <b>100</b> | <b>15</b> | <b>25</b> | <b>35</b> | <b>50</b> | <b>75</b> | <b>100</b> |       |
|---------------------|-----------|-----------|-----------|-----------|-----------|------------|-----------|-----------|-----------|-----------|-----------|------------|-------|
| A                   | 0.499     | 0.514     | 0.515     | 0.529     | 0.485     | 0.445      | 0.473     | 0.508     | 0.502     | 0.359     | 0.117     | 0.076      |       |
| B                   | 0.511     | 0.514     | 0.507     | 0.501     | 0.454     | 0.440      | 0.447     | 0.479     | 0.477     | 0.295     | 0.105     | 0.070      |       |
| C                   | 0.508     | 0.530     | 0.500     | 0.529     | 0.485     | 0.451      | 0.432     | 0.498     | 0.491     | 0.252     | 0.114     | 0.079      | 0.356 |
| D                   | 0.511     | 0.512     | 0.496     | 0.518     | 0.469     | 0.430      | 0.417     | 0.476     | 0.520     | 0.370     | 0.101     | 0.076      | 0.415 |
| E                   | 0.497     | 0.521     | 0.493     | 0.517     | 0.485     | 0.448      |           |           |           |           |           |            | 0.398 |
| F                   | 0.473     | 0.504     | 0.495     | 0.526     | 0.501     | 0.450      |           |           |           |           |           |            | 0.329 |
| G                   | 0.476     | 0.508     | 0.479     | 0.524     | 0.491     | 0.473      |           |           |           |           |           |            |       |
| H                   | 0.474     | 0.503     | 0.496     | 0.503     | 0.459     | 0.445      |           |           |           |           |           |            |       |

| <b>Abs (630 nm)</b> | <b>15</b> | <b>25</b> | <b>35</b> | <b>50</b> | <b>75</b> | <b>100</b> | <b>15</b> | <b>25</b> | <b>35</b> | <b>50</b> | <b>75</b> | <b>100</b> |       |
|---------------------|-----------|-----------|-----------|-----------|-----------|------------|-----------|-----------|-----------|-----------|-----------|------------|-------|
| A                   | 0.128     | 0.129     | 0.129     | 0.132     | 0.124     | 0.117      | 0.127     | 0.147     | 0.130     | 0.107     | 0.085     | 0.054      |       |
| B                   | 0.128     | 0.129     | 0.131     | 0.127     | 0.120     | 0.117      | 0.123     | 0.128     | 0.125     | 0.095     | 0.076     | 0.051      |       |
| C                   | 0.129     | 0.140     | 0.128     | 0.132     | 0.123     | 0.118      | 0.120     | 0.136     | 0.133     | 0.087     | 0.083     | 0.057      | 0.1   |
| D                   | 0.135     | 0.131     | 0.128     | 0.131     | 0.123     | 0.112      | 0.115     | 0.128     | 0.164     | 0.113     | 0.071     | 0.056      | 0.111 |
| E                   | 0.129     | 0.131     | 0.125     | 0.131     | 0.126     | 0.116      |           |           |           |           |           |            | 0.107 |
| F                   | 0.124     | 0.128     | 0.127     | 0.133     | 0.130     | 0.117      |           |           |           |           |           |            | 0.095 |
| G                   | 0.123     | 0.128     | 0.124     | 0.132     | 0.128     | 0.124      |           |           |           |           |           |            |       |
| H                   | 0.123     | 0.128     | 0.126     | 0.126     | 0.119     | 0.116      |           |           |           |           |           |            |       |

|                |
|----------------|
| <b>Caption</b> |
| WPI-Rb ns      |
| free Rb        |
| WPI ns         |
| DMEM (cells)   |

| <b>Abs570-Abs630</b> | <b>15</b> | <b>25</b> | <b>35</b> | <b>50</b> | <b>75</b> | <b>100</b> | <b>15</b> | <b>25</b> | <b>35</b> | <b>50</b> | <b>75</b> | <b>100</b> |              |
|----------------------|-----------|-----------|-----------|-----------|-----------|------------|-----------|-----------|-----------|-----------|-----------|------------|--------------|
| A                    | 0.371     | 0.385     | 0.386     | 0.397     | 0.361     | 0.328      | 0.346     | 0.361     | 0.372     | 0.252     | 0.032     | 0.022      |              |
| B                    | 0.383     | 0.385     | 0.376     | 0.374     | 0.334     | 0.323      | 0.324     | 0.351     | 0.352     | 0.200     | 0.029     | 0.019      |              |
| C                    | 0.379     | 0.390     | 0.372     | 0.397     | 0.362     | 0.333      | 0.312     | 0.362     | 0.358     | 0.165     | 0.031     | 0.022      | <b>0.256</b> |
| D                    | 0.376     | 0.381     | 0.368     | 0.387     | 0.346     | 0.318      | 0.302     | 0.348     | 0.356     | 0.257     | 0.030     | 0.020      | <b>0.304</b> |
| E                    | 0.368     | 0.390     | 0.368     | 0.386     | 0.359     | 0.332      |           |           |           |           |           |            | <b>0.291</b> |
| F                    | 0.349     | 0.376     | 0.368     | 0.393     | 0.371     | 0.333      |           |           |           |           |           |            | <b>0.234</b> |
| G                    | 0.353     | 0.380     | 0.355     | 0.392     | 0.363     | 0.349      |           |           |           |           |           |            |              |
| H                    | 0.351     | 0.375     | 0.370     | 0.377     | 0.340     | 0.329      |           |           |           |           |           |            |              |

| <b>Average</b> | <b>15</b> | <b>25</b> | <b>35</b> | <b>50</b> | <b>75</b> | <b>100</b> | <b>15</b> | <b>25</b> | <b>35</b> | <b>50</b> | <b>75</b> | <b>100</b> |              |
|----------------|-----------|-----------|-----------|-----------|-----------|------------|-----------|-----------|-----------|-----------|-----------|------------|--------------|
| A              |           |           |           |           |           |            |           |           |           |           |           |            |              |
| B              | 0.377     | 0.385     | 0.376     | 0.389     | 0.351     | 0.326      | 0.321     | 0.356     | 0.360     | 0.219     | 0.031     | 0.021      | <b>0.271</b> |
| C              |           |           |           |           |           |            |           |           |           |           |           |            |              |
| D              |           |           |           |           |           |            |           |           |           |           |           |            |              |
| E              | 0.355     | 0.380     | 0.365     | 0.387     | 0.358     | 0.336      |           |           |           |           |           |            |              |
| F              |           |           |           |           |           |            |           |           |           |           |           |            |              |
| G              |           |           |           |           |           |            |           |           |           |           |           |            |              |
| H              |           |           |           |           |           |            |           |           |           |           |           |            |              |

| <b>% Viability</b> | <b>15</b> | <b>25</b> | <b>35</b> | <b>50</b> | <b>75</b> | <b>100</b> | <b>15</b> | <b>25</b> | <b>35</b> | <b>50</b> | <b>75</b> | <b>100</b> |               |
|--------------------|-----------|-----------|-----------|-----------|-----------|------------|-----------|-----------|-----------|-----------|-----------|------------|---------------|
| A                  | 136.77    | 141.94    | 142.30    | 146.36    | 133.09    | 120.92     | 127.56    | 133.09    | 137.14    | 92.90     | 11.80     | 8.11       |               |
| B                  | 141.20    | 141.94    | 138.62    | 137.88    | 123.13    | 119.08     | 119.45    | 129.40    | 129.77    | 73.73     | 10.69     | 7.00       |               |
| C                  | 139.72    | 143.78    | 137.14    | 146.36    | 133.46    | 122.76     | 115.02    | 133.46    | 131.98    | 60.83     | 11.43     | 8.11       | <b>94.38</b>  |
| D                  | 138.62    | 140.46    | 135.67    | 142.67    | 127.56    | 117.24     | 111.34    | 128.29    | 131.24    | 94.75     | 11.06     | 7.37       | <b>112.07</b> |
| E                  | 135.67    | 143.78    | 135.67    | 142.30    | 132.35    | 122.40     |           |           |           |           |           |            | <b>107.28</b> |
| F                  | 128.66    | 138.62    | 135.67    | 144.88    | 136.77    | 122.76     |           |           |           |           |           |            | <b>86.27</b>  |
| G                  | 130.14    | 140.09    | 130.88    | 144.52    | 133.82    | 128.66     |           |           |           |           |           |            |               |
| H                  | 129.40    | 138.25    | 136.41    | 138.99    | 125.35    | 121.29     |           |           |           |           |           |            |               |
