# Supplementary material for: Development of 3D-printed foods incorporating riboflavin-loaded whey protein isolate nanostructures: characterization and in vitro digestion
Source: Royal Society of Chemistry journal article supplement (doi:10.1039/d4fo05102e), 2025-01-01
Supplement: d4fo05102e4.pdf [file d4fo05102e4.pdf]

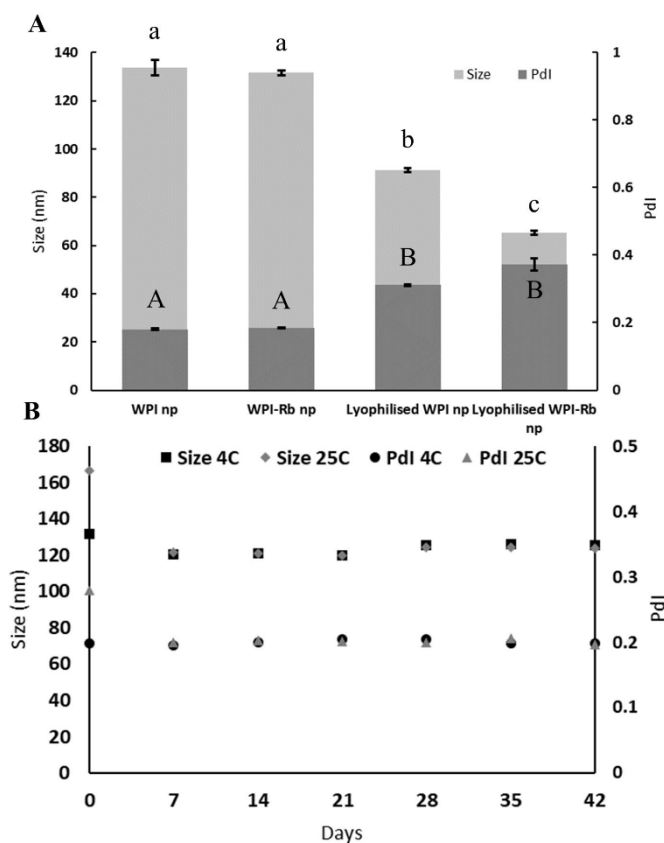

**Figure S1.** Size and PDI of WPI nanostructures as an effect of: (A) riboflavin association and lyophilization process and (B) storage period at 4 °C and 25 °C, where data are presented as mean  $\pm$  standard deviation (95 % confidence interval). <sup>a-c</sup>Different lower-case letters indicate significant differences between encapsulation efficiency samples values ( $p < 0.05$ ). <sup>A-C</sup>Different upper-case letters indicate significant differences between loading capacity samples values ( $p < 0.05$ ).
