# Supplementary figures and images for: Development of 3D-printed foods incorporating riboflavin-loaded whey protein isolate nanostructures: characterization and in vitro digestion
Source: Royal Society of Chemistry journal article supplement (doi:10.1039/d4fo05102e), 2025-01-01

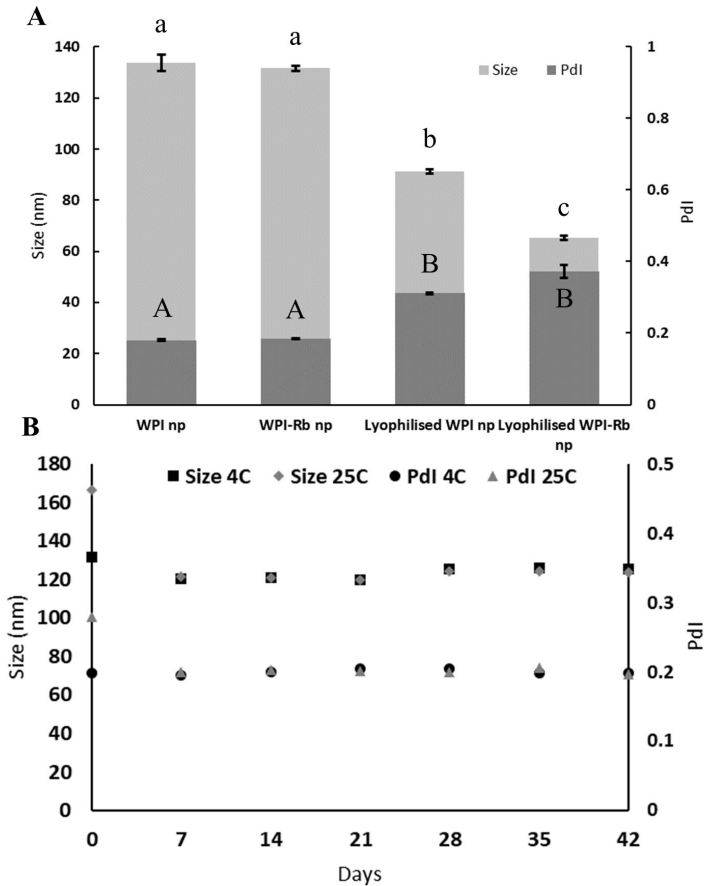

Supplement: d4fo05102e1.pdf [file d4fo05102e1.pdf]

Representative graph of all inks' angular frequency sweep experiments.

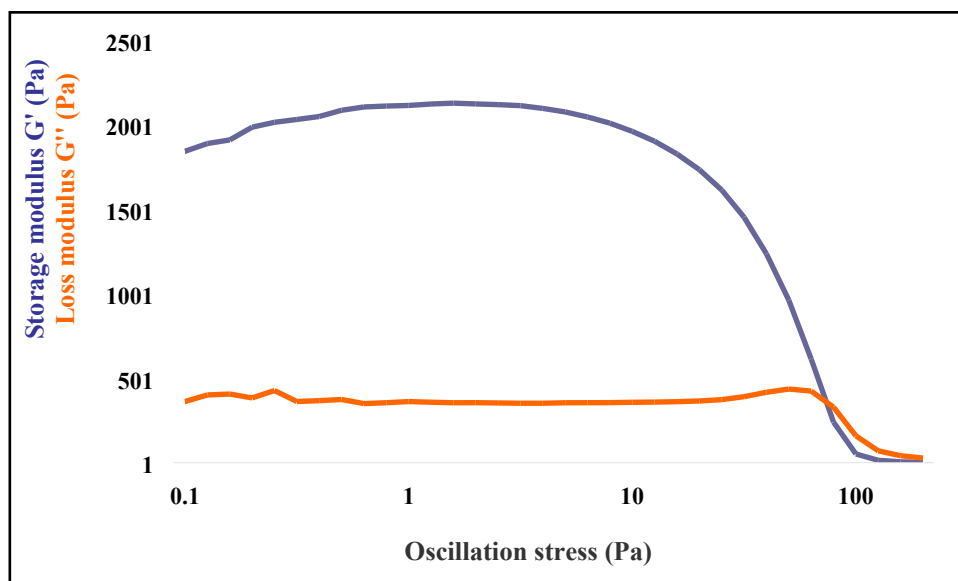

Supplement: d4fo05102e3.pdf [file d4fo05102e3.pdf]
